# Supplementary material
Source: PubMed Central journal article supplement (PMC3311731)
Supplement: NIHMS358401-supplement-Supp_figs_and_legends.pdf [file NIHMS358401-supplement-Supp_figs_and_legends.pdf]

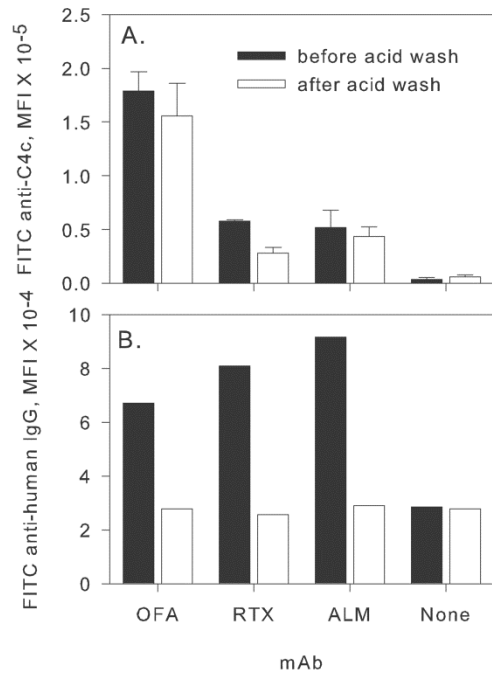

SupFig1AB

**Supplementary Figure 1.** In C5-depleted NHS, opsonization of Wien cells with OFA promotes more deposition of C4b than does opsonization with ALM or RTX. **A.** C4b deposition, based on an FITC-labeled antibody preparation specific for C4c, was determined directly (filled bars), or after an acid wash (open bars). The means and SD (n=3) are displayed. **B.** Binding of the opsonizing mAbs (filled bars), based on probing with FITC anti-human IgG, was reduced to background after the acid wash (open bars).

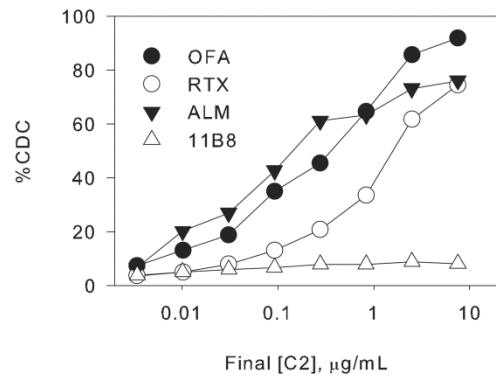

SupFig2

**Supplementary Figure 2.** OFA- (filled circles) and ALM- (filled triangles) opsonized Wien cells are killed more effectively in C2 depleted serum supplemented with C2 than are RTX-(open circles) opsonized Wien cells. No CDC was evident in the presence of the control mAb, 11B8 (open triangles). Dead cells were identified by uptake of PI.

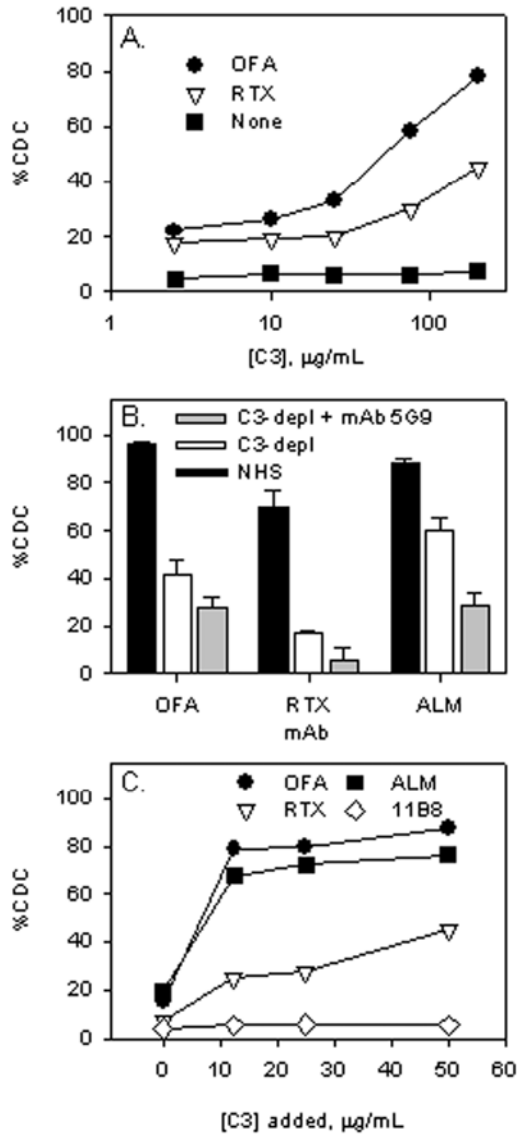

**Supplementary Figure 3.** Small amounts of C3, added to serum with very low levels of C3, are adequate to support CDC of OFA-opsonized SU-DHL cells, and similarly support CDC of OFA or ALM-opsonized Wien cells, but RTX-mediated CDC is modest in comparison. **A.** SU-DHL cells, opsonized with OFA or with RTX. **B.** Wien cells, opsonized with OFA or RTX or ALM, means and SD (n=3) are provided. The final concentration of anti-C3 mAb 5G9 (added to block residual C3) was 100 µg/mL. **C.** Dose-response CDC experiment in C3-depleted serum for Wien cells that were opsonized as indicated. In **A** and **B** the background CDC in the absence of added C3 was due to small amounts of active C3 still present in the sera. In **C**, the C3 was removed from NHS by affinity chromatography, and less C3 activity was present. Dead cells were identified by uptake of PI.

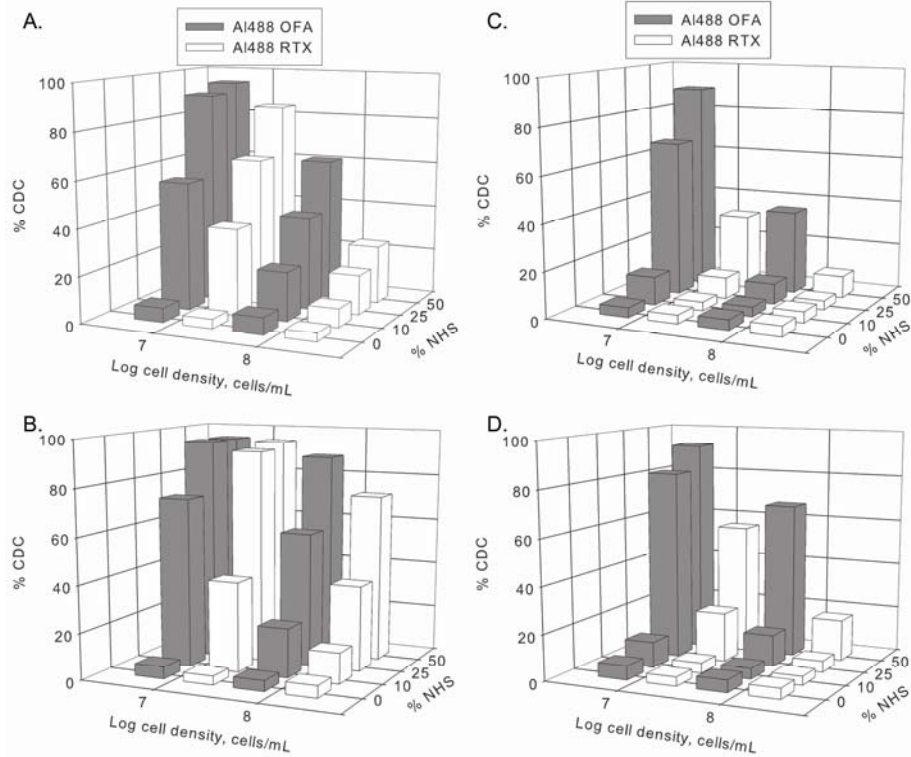

**Supplementary Figure 4.** Dose-response experiments reveal that for high cell densities, CDC mediated by OFA or by RTX requires high complement and mAb inputs. **A-B.** Daudi cells. **C-D.** Z138 cells. The mAb concentrations were 10 µg/mL (**A** and **C**) and 100 µg/mL (**B** and **D**). At low cell densities and in 50% NHS, CDC mediated by OFA and RTX were roughly comparable for Daudi cells, but for Z138 cells, CDC mediated by OFA was substantially higher than CDC mediated by RTX. In these 3D graphs error bars were omitted for clarity. Representative values (means and SD) were as follows: For 10 µg/ml OFA, 25% NHS and  $1 \times 10^8$  Daudi cells cells/ml, CDC was  $40 \pm 2\%$ ; the same conditions for Z138 cells, CDC was  $8.8 \pm 0.7\%$ . Dead cells were identified by uptake of TOPRO-3.
